# Supplementary material
Source: publisher figshare collection journal article supplement (https://tandf.figshare.com/ndownloader/files/15251021)

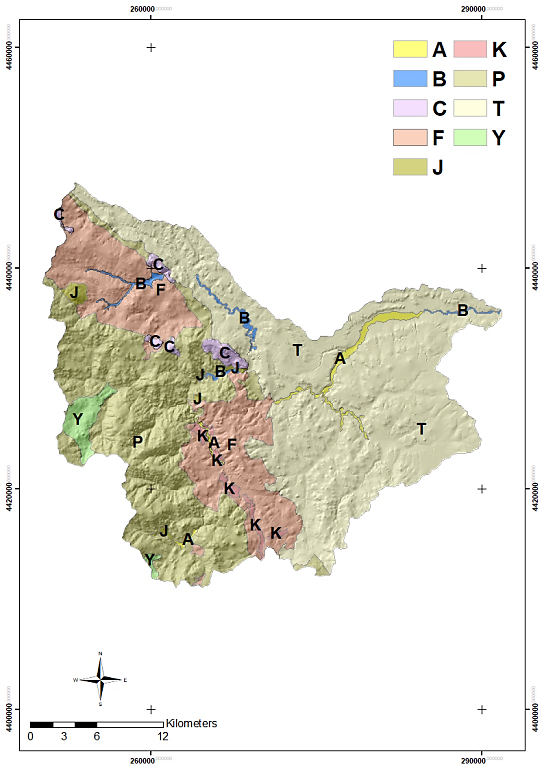


**Figure S1.** Soil classification map.


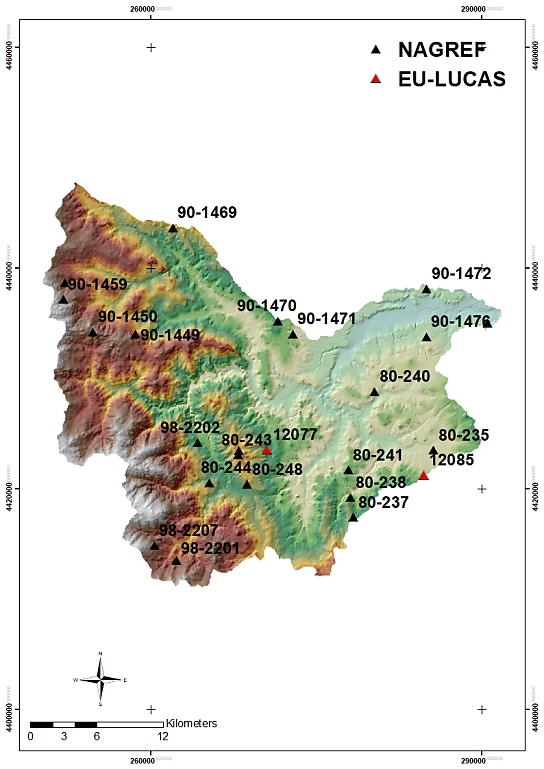


**Figure S2**. Soil samples.


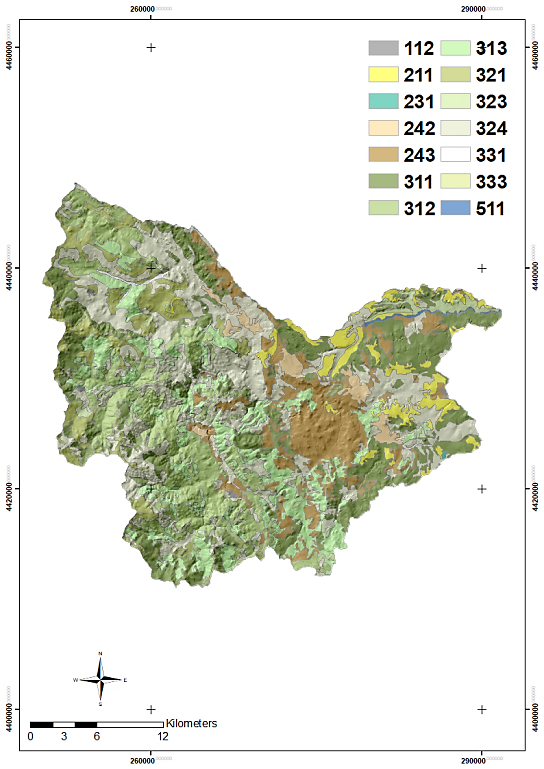


**Figure S3**. Land use.


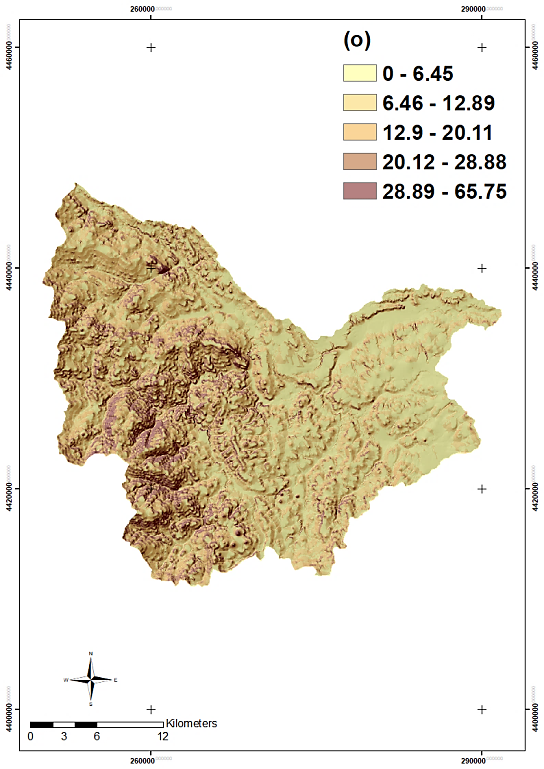


**Figure S4.** Slope.

Supplement: Supplementary file 1 [file 15251021]
